# Supplementary material
Source: publisher figshare collection journal article supplement (https://tandf.figshare.com/ndownloader/files/14242583)
Supplement: Supplementary file 1 [file 14242583]

Supplementary Table 1 Sequences of primers used for qRT-PCR

| Primers | Sequences (5′-3′) | Product length  (bp) |
| --- | --- | --- |
| *lasB F* | ATGTTCTATCCGCTGGTGTC | 112 |
| *lasB R* | CTTCGTTCATTCCGCCTGA |  |
| *exoS F* | GAGCGAGGTCAGCAGAGTAT | 121 |
| *exoS R* | TTCGGCGTCACTGTGGAT |  |
| *popB F* | ACCAGCAGAAGAAACTCAAGC | 160 |
| *popB R* | GCACTGATCCAACCAAAGATTT |  |
| *phzS F* | CAAGCAATCCTCGACGGCAT | 180 |
| *phzS R* | GCTCTTCTCGGTCTTCGGT |  |
| *pscC F* | CCTACTATGTGCGGGTCACG | 158 |
| *pscC R* | GCTATTGGGTTTCTGGCTGC |  |
| *16S rRNA F* | ACACGGTCCAGACTCCTAC | 132 |
| *16S rRNA R* | CTGCCCTTCCTCCCAACTT |  |
